# Supplementary material
Source: publisher figshare collection journal article supplement (https://sage.figshare.com/ndownloader/files/17722619)
Supplement: Supplementary file 1 [file 17722619]

## Sheet: Sheet1
Table S7
Time Lag (i.e., Phase Shift) Between Two 95%-Significant Signals Having the Same Period
Dust Flux Versus Wind/Precipitation/MEI Signals (CP/BSNE With Respect to Wind/Precipitation/MEI)
	Period (days)	Phase shift (days)
CP vs.
Marcos Juárez precipitation	326 to 407	-37 to -45
Marcos Juárez wind speed	326 to 407	+76 to +98
MEI	300 to 371	-132 to -165
La Quiaca precipitation	296 to 465	-17 to -36
San Luis precipitation	296 to 465	-20 to +4
Bahía Blanca precipitation	326 to 407	-24 to -48
	650 to 1085	-36 to -142
La Quiaca wind speed	102 to 109	+6 to +10
	181 to 204	-2 to -3
	233 to 251	+3 to +7
	271 to 407	+11 to +37
	1085	-140
San Luis wind speed	233 to 1085	+11 to +40
Bahía Blanca wind speed	296 to 465	-6 to -2
BSNE vs.
Marcos Juárez precipitation	137 to 156	-17 to -26
	182 to 205	-46 to -50
	328 to 410	-40 to -45
Marcos Juárez wind speed	143	-35
MEI	216 to 260	-70 to -42
	650 to 1114	0 to +83
La Quiaca precipitation	328 to 365	-52 to -58
San Luis precipitation	-	-
Bahía Blanca precipitation	298 to 365	-40 to -41
La Quiaca wind speed	328 to 365	+16 to +17
San Luis wind speed	328 to 822	-54 to -135
Bahía Blanca wind speed	219 to 252	+54 to +82
	328 to 410	-22 to -25
